# Supplementary material for: The role of transcriptional repressor activity of LexA in salt-stress responses of the cyanobacterium Synechocystis sp. PCC 6803
Source: PubMed Central journal article supplement (PMC7567884; doi:10.1038/s41598-020-74534-7), 2020-10-15
Supplement: 41598_2020_74534_MOESM2_ESM.pdf [file 41598_2020_74534_MOESM2_ESM.pdf]

# **The role of transcriptional repressor activity of LexA in salt-stress responses of the cyanobacterium *Synechocystis* sp. PCC 6803**

Kosuke Takashima<sup>a</sup>, Syota Nagao<sup>a</sup>, Ayumi Kizawa<sup>a</sup>, Takehiro Suzuki<sup>b</sup>,  
Naoshi Dohmae<sup>b</sup>, Yukako Hihara<sup>a\*</sup>

<sup>a</sup>Graduate School of Science and Engineering, Saitama University,  
255 Shimo-Okubo, Saitama 338-8570, Japan

<sup>b</sup>Biomolecular Characterization Unit, RIKEN Center for Sustainable Resource  
Science, 2-1 Hirosawa, Wako, Saitama 351-0198, Japan

\*Corresponding author

## **Supplementary information**

Supplementary Figures: this file

Supplementary Tables: provided separately as spreadsheets (.xlsx)

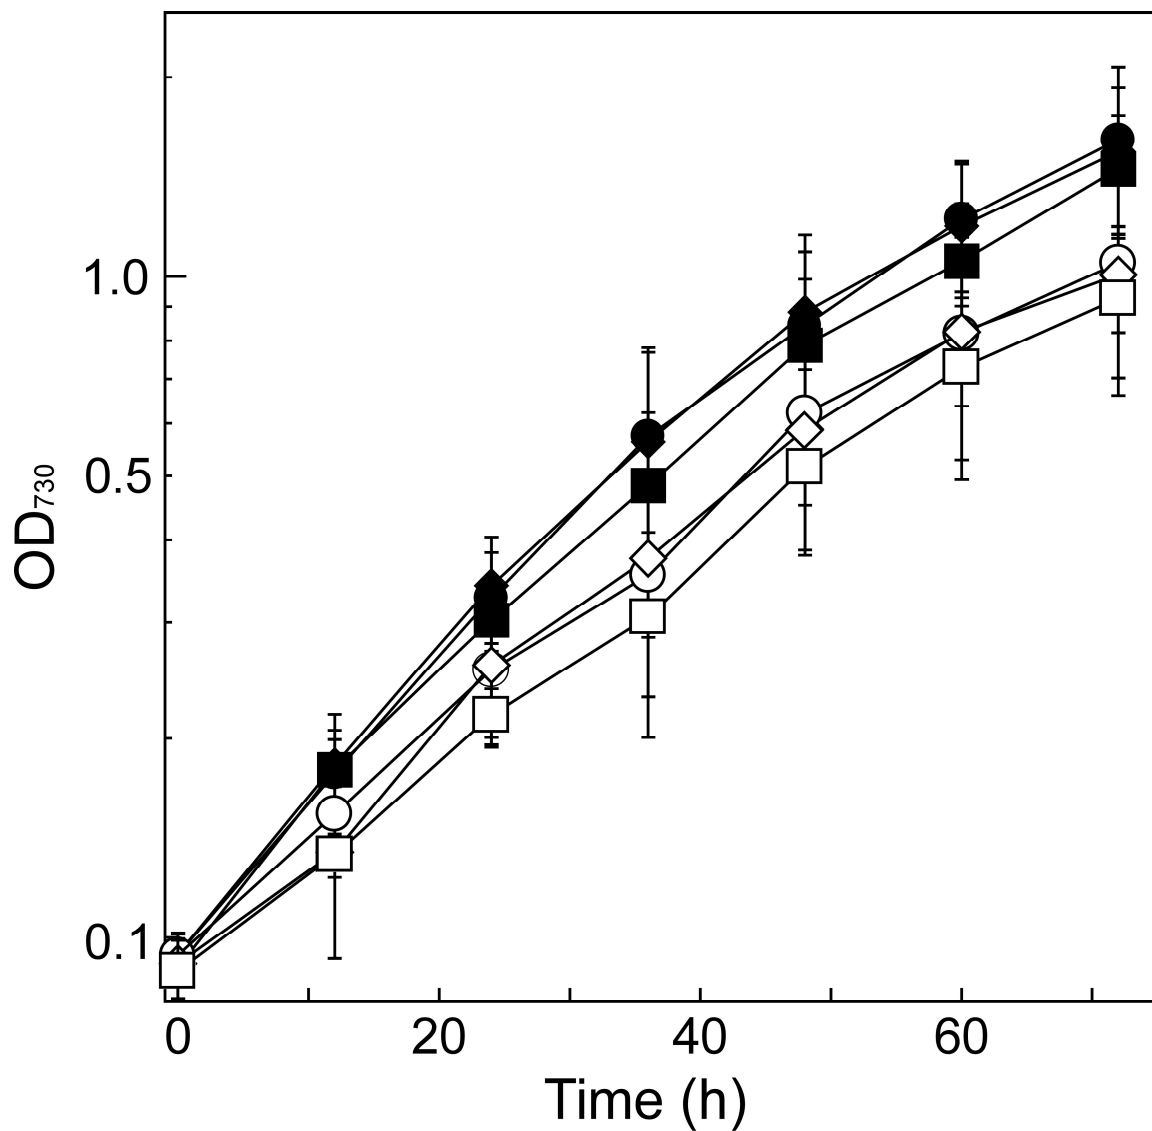

**Supplementary Figure S1. Effect of the addition of NaCl on the growth of WT and the  $\Delta lexA$  cells.** Cells that had been grown to  $OD_{730} = 0.5$  in normal BG-11 medium were seeded at  $OD_{730} = 0.1$  in normal BG-11 medium (WT: ●,  $\Delta lexA$ : ○) or in BG-11 medium supplemented with NaCl to the final concentration of 250 mM (WT: ◆,  $\Delta lexA$ : ◇) or 500 mM (WT: ■,  $\Delta lexA$ : □) and grown for 72 h. The data are the mean values  $\pm$ SD of three biological replicates.

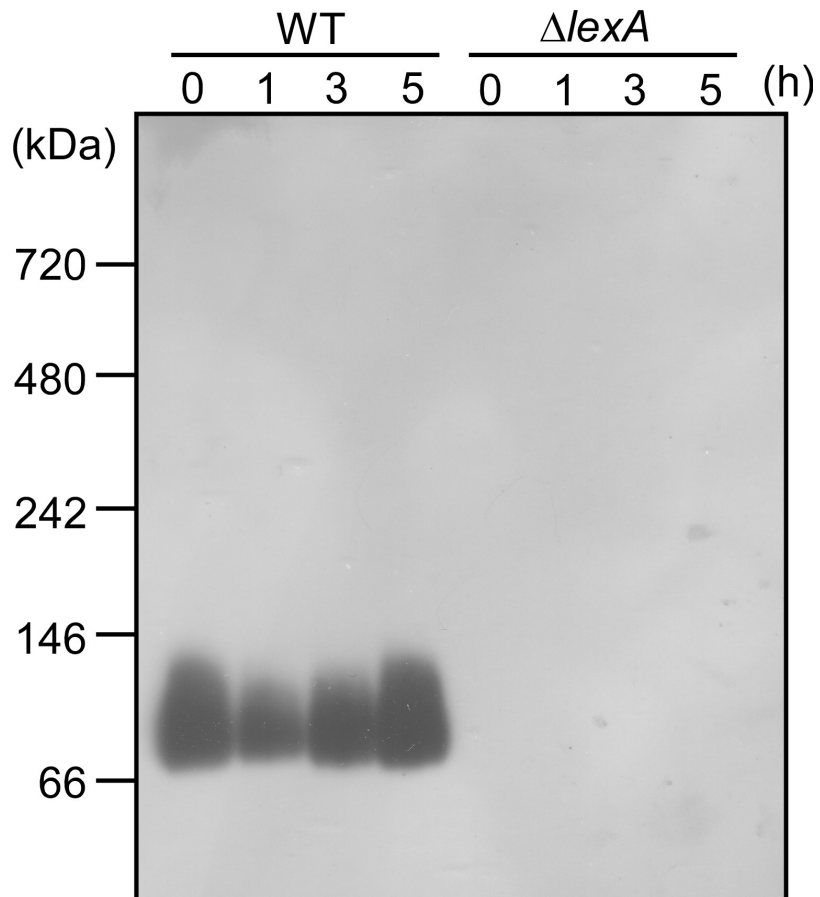

**Supplementary Figure S2. Oligomerization state of LexA examined by BN-PAGE of the cell lysate followed by immunodetection of LexA.** The cell lysates of WT and the  $\Delta lexA$  cells were subjected to BN-PAGE, followed by electroblotting onto PVDF membrane and immunodetection using the specific antibody against LexA. Numbers indicate the migration pattern of NativeMark Unstained Protein Standard (Thermo Fisher).

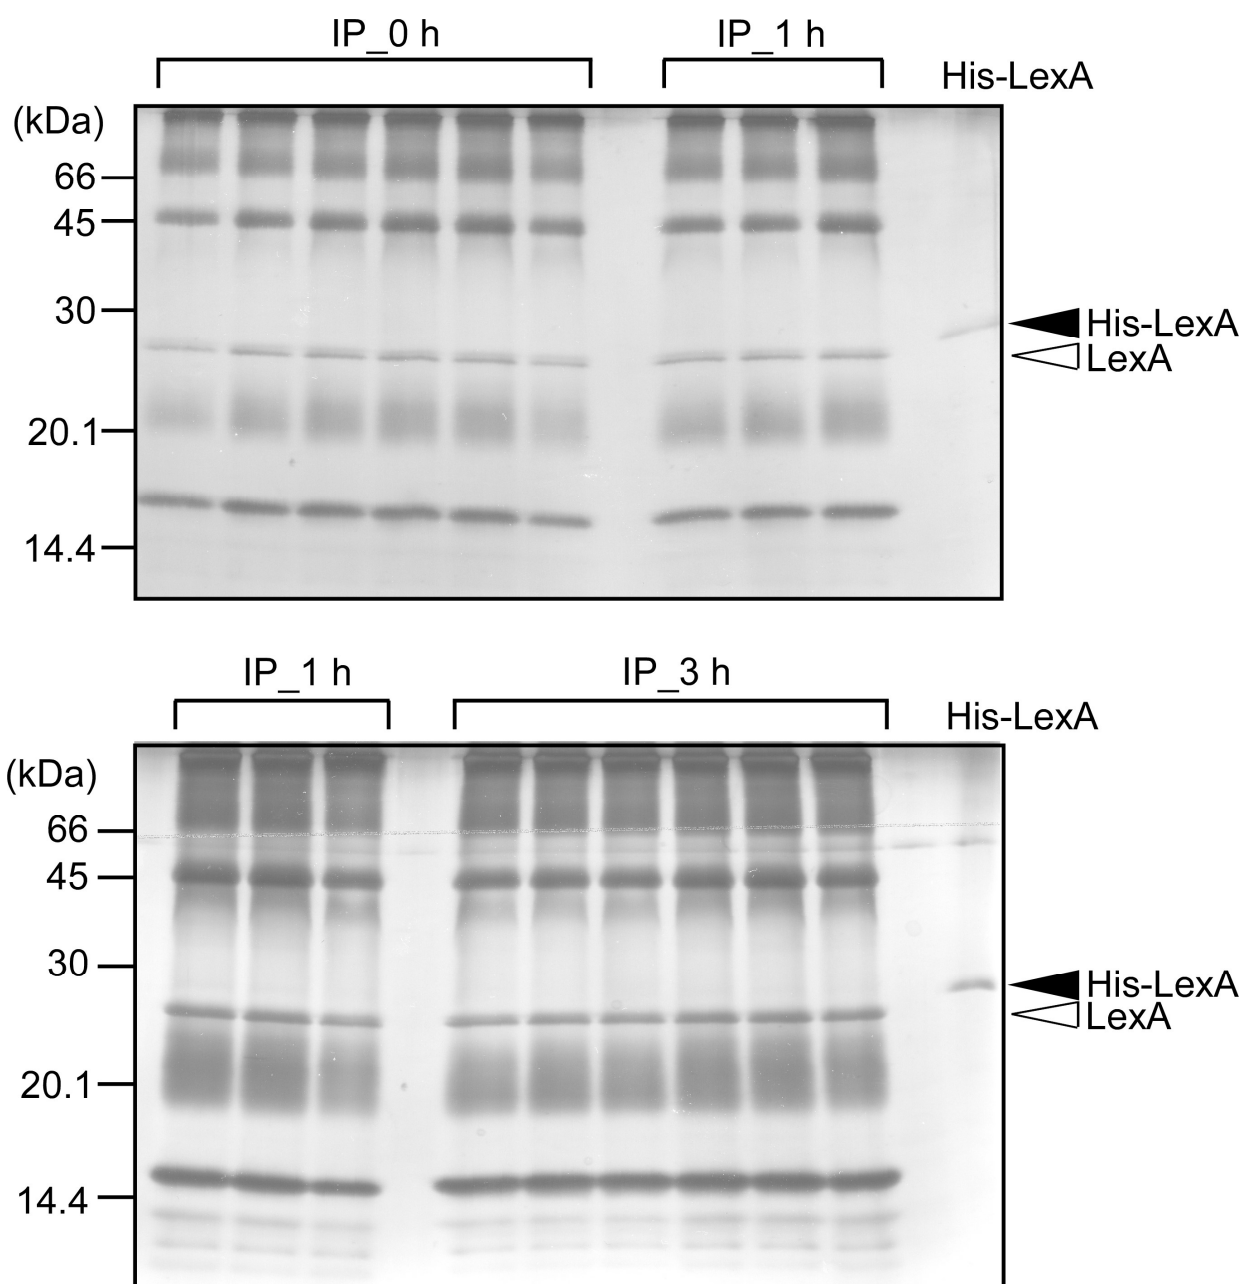

**Supplementary Figure S3. Preparative electrophoresis of immunoprecipitated LexA for LC-MS/MS analysis.** LexA was immunoprecipitated from S.6803 cell extracts after 0, 1 and 3 h of incubation with 500 mM NaCl. 100  $\mu$ L of eluate from each time point was divided into six aliquots and subjected to SDS-PAGE. 27 kDa bands of LexA protein (white arrowhead) were excised after silver staining to be analyzed by LC-MS/MS.

MS/MS Fragmentation of **ASNNKGPGQELKASDVEIQILMGVWR**

Found in **BAA17770.1** in **S\_PCC6803**, SOS function regulatory protein [Synechocystis sp. PCC 6803]

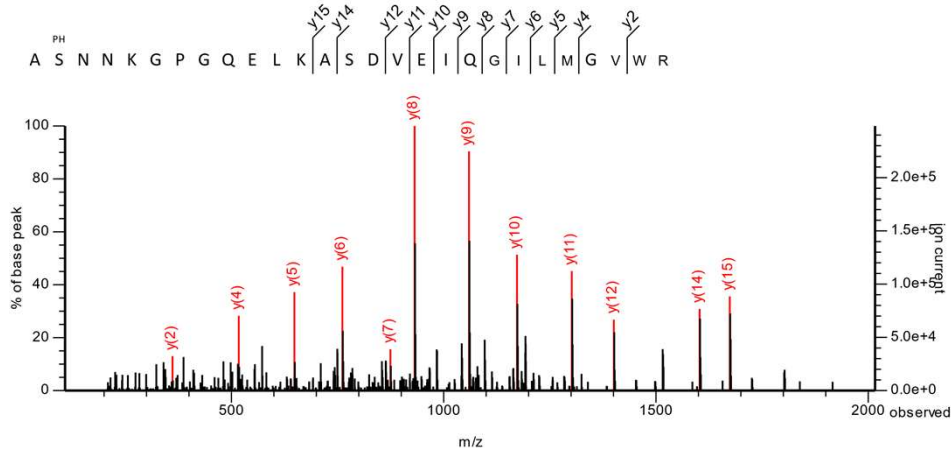

| Monoisotopic mass of neutral peptide Mr(calc): 2976.4528               |          |                 |                |                  |                |                  |      |          |                 |                |                  |                |                  |    |
|------------------------------------------------------------------------|----------|-----------------|----------------|------------------|----------------|------------------|------|----------|-----------------|----------------|------------------|----------------|------------------|----|
| Variable modifications                                                 |          |                 |                |                  |                |                  |      |          |                 |                |                  |                |                  |    |
| S2 : Phospho (ST), with neutral losses 0.0000(shown in table), 97.9769 |          |                 |                |                  |                |                  |      |          |                 |                |                  |                |                  |    |
| Ions Score: 86 Expect: 2.9e-008                                        |          |                 |                |                  |                |                  |      |          |                 |                |                  |                |                  |    |
| Matches : 12/440 fragment ions using 18 most intense peaks (help)      |          |                 |                |                  |                |                  |      |          |                 |                |                  |                |                  |    |
| #                                                                      | b        | b <sup>++</sup> | b <sup>*</sup> | b <sup>+++</sup> | b <sup>0</sup> | b <sup>0++</sup> | Seq. | y        | y <sup>++</sup> | y <sup>*</sup> | y <sup>+++</sup> | y <sup>0</sup> | y <sup>0++</sup> | #  |
| 1                                                                      | 72.0444  | 36.5258         |                |                  |                |                  | A    |          |                 |                |                  |                |                  | 27 |
| 2                                                                      | 239.0427 | 120.025         |                |                  | 221.0322       | 111.0197         | S    | 2906.423 | 1453.715        | 2889.397       | 1445.202         | 2888.413       | 1444.71          | 26 |
| 3                                                                      | 353.0857 | 177.0465        | 336.0591       | 168.5332         | 335.0751       | 168.0412         | N    | 2739.425 | 1370.216        | 2722.398       | 1361.703         | 2721.414       | 1361.211         | 25 |
| 4                                                                      | 467.1286 | 234.0679        | 450.1021       | 225.5547         | 449.118        | 225.0627         | N    | 2625.382 | 1313.195        | 2608.355       | 1304.681         | 2607.371       | 1304.189         | 24 |
| 5                                                                      | 595.2236 | 298.1154        | 578.197        | 289.6021         | 577.213        | 289.1101         | K    | 2511.339 | 1256.173        | 2494.312       | 1247.66          | 2493.328       | 1247.168         | 23 |
| 6                                                                      | 652.245  | 326.6262        | 635.2185       | 318.1129         | 634.2345       | 317.6209         | G    | 2383.244 | 1192.126        | 2366.217       | 1183.612         | 2365.233       | 1183.12          | 22 |
| 7                                                                      | 749.2978 | 375.1525        | 732.2712       | 366.6393         | 731.2872       | 366.1473         | P    | 2326.222 | 1163.615        | 2309.196       | 1155.102         | 2308.212       | 1154.61          | 21 |
| 8                                                                      | 806.3193 | 403.6633        | 789.2927       | 395.15           | 788.3087       | 394.658          | G    | 2229.17  | 1115.088        | 2212.143       | 1106.575         | 2211.159       | 1106.083         | 20 |
| 9                                                                      | 934.3778 | 467.6926        | 917.3513       | 459.1793         | 916.3673       | 458.6873         | Q    | 2172.148 | 1086.578        | 2155.122       | 1078.064         | 2154.138       | 1077.572         | 19 |
| 10                                                                     | 1063.42  | 532.2139        | 1046.394       | 523.7006         | 1045.41        | 523.2086         | E    | 2044.09  | 1022.548        | 2027.063       | 1014.035         | 2026.079       | 1013.543         | 18 |
| 11                                                                     | 1176.505 | 588.7559        | 1159.478       | 580.2426         | 1158.494       | 579.7506         | L    | 1915.047 | 958.0271        | 1898.02        | 949.5139         | 1897.036       | 949.0218         | 17 |
| 12                                                                     | 1304.6   | 652.8034        | 1287.573       | 644.2901         | 1286.589       | 643.7981         | K    | 1801.963 | 901.4851        | 1784.936       | 892.9718         | 1783.952       | 892.4798         | 16 |
| 13                                                                     | 1375.637 | 688.3219        | 1358.61        | 679.8086         | 1357.626       | 679.3166         | A    | 1673.9   | 837.4376        | 1656.841       | 828.9243         | 1655.857       | 828.4323         | 15 |
| 14                                                                     | 1462.669 | 731.8379        | 1445.642       | 723.3247         | 1444.658       | 722.8327         | S    | 1602.8   | 801.9191        | 1585.804       | 793.4058         | 1584.82        | 792.9138         | 14 |
| 15                                                                     | 1577.696 | 789.3514        | 1560.669       | 780.8381         | 1559.685       | 780.3461         | D    | 1515.799 | 758.403         | 1498.772       | 749.8898         | 1497.788       | 749.3978         | 13 |
| 16                                                                     | 1676.764 | 838.8856        | 1659.737       | 830.3723         | 1658.753       | 829.8803         | V    | 1400.8   | 700.8896        | 1383.745       | 692.3763         | 1382.761       | 691.8843         | 12 |
| 17                                                                     | 1805.807 | 903.4069        | 1788.78        | 894.8936         | 1787.796       | 894.4016         | E    | 1301.7   | 651.3554        | 1284.677       | 642.8421         | 1283.693       | 642.3501         | 11 |
| 18                                                                     | 1918.891 | 959.9489        | 1901.864       | 951.4357         | 1900.88        | 950.9437         | I    | 1172.7   | 586.8341        | 1155.634       | 578.3208         |                |                  | 10 |
| 19                                                                     | 2046.949 | 1023.978        | 2029.923       | 1015.465         | 2028.939       | 1014.973         | Q    | 1059.6   | 530.292         | 1042.55        | 521.7788         |                |                  | 9  |
| 20                                                                     | 2103.971 | 1052.489        | 2086.944       | 1043.976         | 2085.96        | 1043.484         | G    | 931.52   | 466.2627        | 914.4917       | 457.7495         |                |                  | 8  |
| 21                                                                     | 2217.055 | 1109.031        | 2200.028       | 1100.518         | 2199.044       | 1100.026         | I    | 874.5    | 437.752         | 857.4702       | 429.2387         |                |                  | 7  |
| 22                                                                     | 2330.139 | 1165.573        | 2313.112       | 1157.06          | 2312.128       | 1156.568         | L    | 761.41   | 381.21          | 744.3861       | 372.6967         |                |                  | 6  |
| 23                                                                     | 2461.179 | 1231.093        | 2444.153       | 1222.58          | 2443.169       | 1222.088         | M    | 648.33   | 324.668         | 631.3021       | 316.1547         |                |                  | 5  |
| 24                                                                     | 2518.201 | 1259.604        | 2501.174       | 1251.091         | 2500.19        | 1250.599         | G    | 517.29   | 259.1477        | 500.2616       | 250.6344         |                |                  | 4  |
| 25                                                                     | 2617.269 | 1309.138        | 2600.243       | 1300.625         | 2599.259       | 1300.133         | V    | 460.2667 | 230.637         | 443.2401       | 222.1237         |                |                  | 3  |
| 26                                                                     | 2803.349 | 1402.178        | 2786.322       | 1393.665         | 2785.338       | 1393.173         | W    | 361.2    | 181.1028        | 344.1717       | 172.5895         |                |                  | 2  |
| 27                                                                     |          |                 |                |                  |                |                  | R    | 175.119  | 88.0631         | 158.0924       | 79.5498          |                |                  | 1  |

| All matches to this query |          |         |                                            |                   |
|---------------------------|----------|---------|--------------------------------------------|-------------------|
| Score                     | Mr(calc) | Delta   | Sequence                                   | Site Analysis     |
| 85.8                      | 2976.453 | -0.0208 | <a href="#">ASNNKGPGQELKASDVEIQILMGVWR</a> | Phospho S2 99.84% |
| 57.9                      | 2976.453 | -0.0208 | <a href="#">ASNNKGPGQELKASDVEIQILMGVWR</a> | Phospho S14 0.16% |

**Supplementary Figure S4. Identification of the phosphorylation site in the phosphopeptide ASNNKGPGQELKASDVEIQILMGVWR detected by LC-MS/MS analysis.**

The phosphorylation analysis was performed by MASCOT program ver 2.6 (Matrix Science) according to the method described in Savitski et al. (2011) Confident phosphorylation site localization using the Mascot delta score. Mol Cell Proteomics 10: M110.003830.

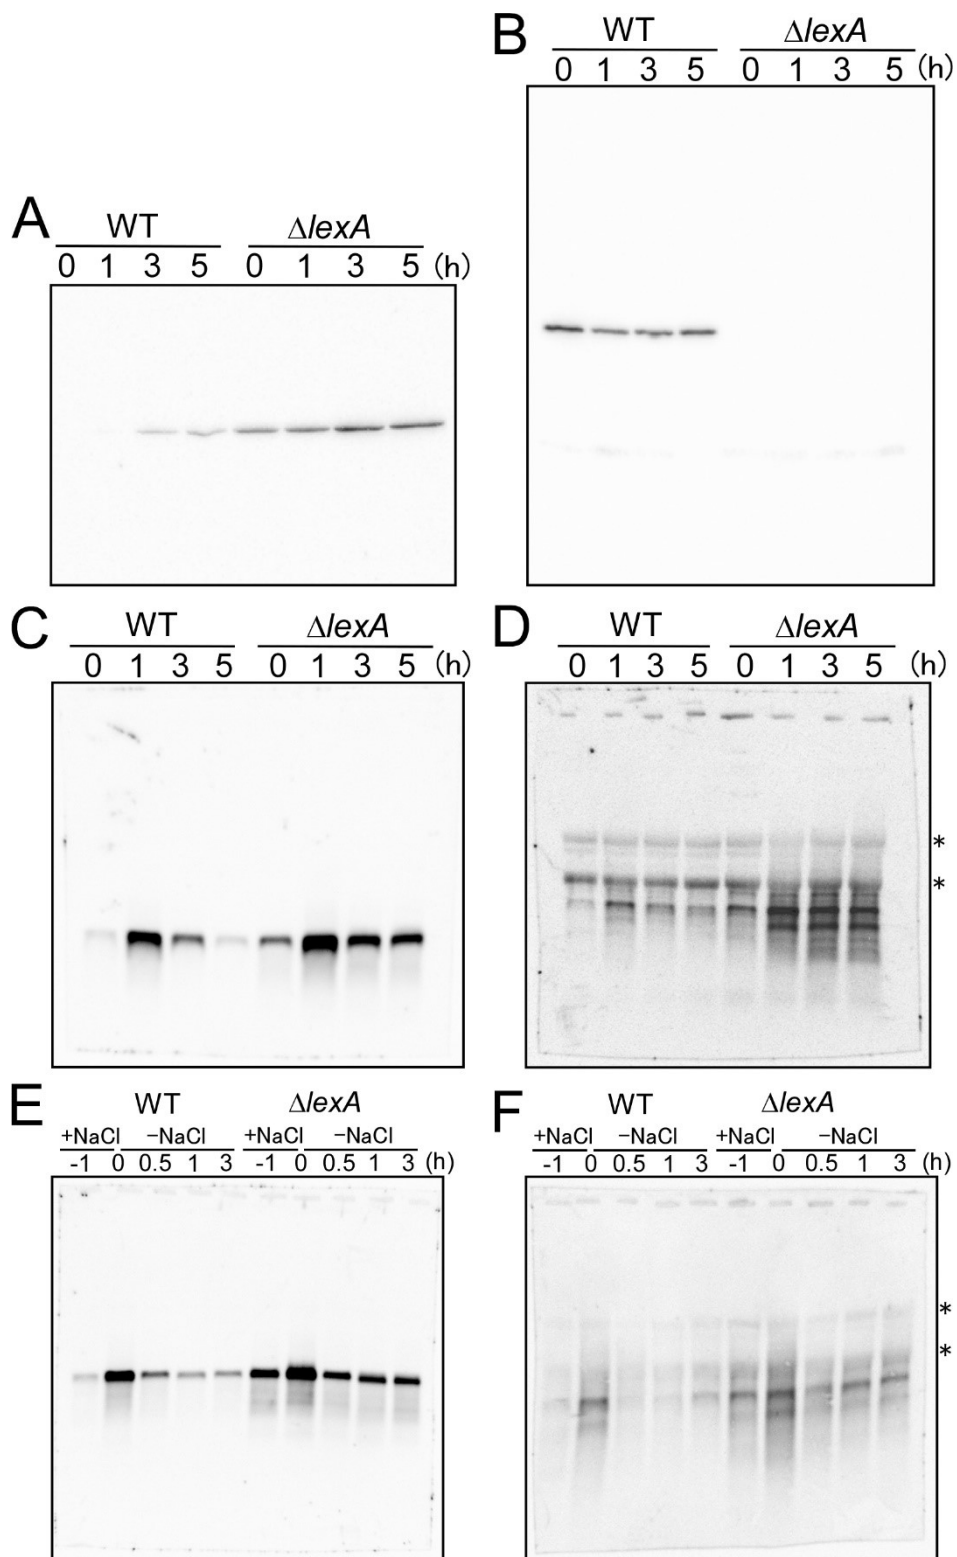

**Supplementary Figure S5. Uncropped images of Figures 3, 4B and 5.**

A, Figure 3: GgpS. B, Figure 3: LexA. C, Figure 4B: *hspA*. D, Figure 4B: *nblB*. E, Figure 5: *hspA*. F, Figure 5: *nblB*. The asterisks indicate nonspecific hybridization to 23S and 16S rRNAs.
